---

Erratum

## Erratum to: abPOA: an SIMD-based C library for fast partial order alignment using adaptive band

Yan Gao , Yongzhuang Liu, Yanmei Ma, Bo Liu, Yadong Wang and Yi Xing

---

*Bioinformatics*, 2021, 37(15), 2209–2211. doi: <https://doi.org/10.1093/bioinformatics/btaa963>

Upon the original publication of this article, the affiliation: “Center for Bioinformatics, Department of Computer Science and Technology, Harbin Institute of Technology, Harbin, Heilongjiang 150001, China” was inadvertently omitted prior to publication. The affiliation has been reinstated.
